# Supplementary material for: Chronic high-altitude exposure and the epidemiology of ischaemic stroke: a systematic review
Source: HighWire-hosted journal article supplement (doi:10.1136/bmjopen-2021-051777), 2022-04-01
Supplement: bmjopen-2021-051777supp001_data_supplement.pdf [file bmjopen-2021-051777supp001_data_supplement.pdf]

## Supplementary File 1

The literature review process was performed in English in order to cover the largest number of scientific databases and repositories containing academic literature from all over the world that are accessible for most of the researchers.

The following libraries, repositories and databases were accessed using the University of Southampton library tool Delphis: AMED, EMBASE, Cochrane Library, PubMed, MEDLINE and Europe PMC. The Latin-American bibliographic database Scielo was also included in a separate search from its website repository. The following terms were used during the search strategy while defined terms within the parenthesis were combined with the Boolean operator "OR".

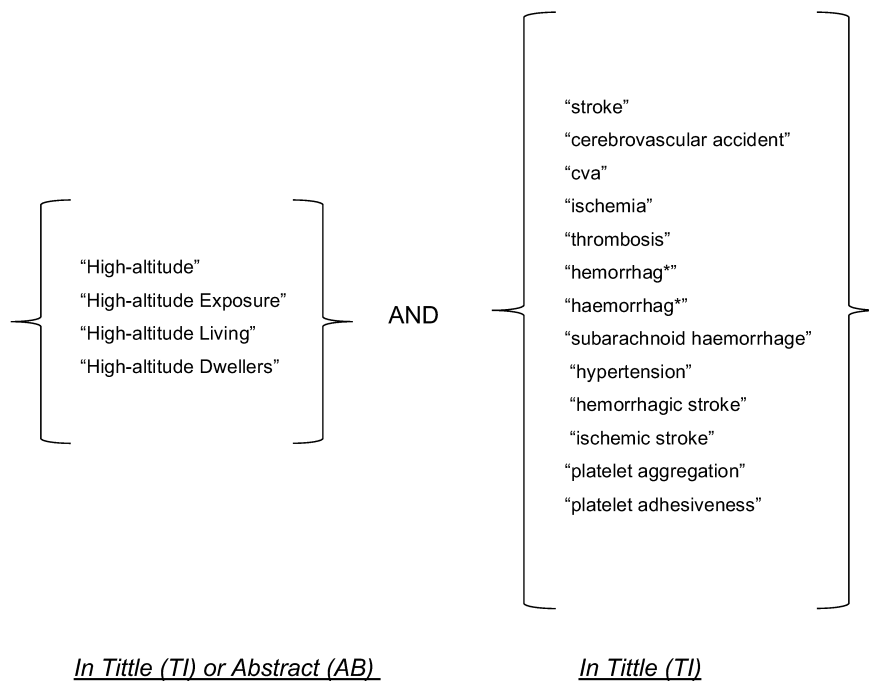

The exclusion criteria for the literature review excluded all *in vivo* and *in vitro* studies and all the data analysed that did not concern human studies. If the search term "stroke" referred to cardiac output or stroke volume, the results were also excluded. The length of the data extraction was set from 1960 to 2021 and any study that matched the search strategy and did not counterpose the exclusion criteria were revised.

A total of 1,890 manuscripts were retrieved during the first step of the literature review process and only those which fulfil the inclusion criteria were included for the author's revision. After this process, a total of 221 abstracts were reviewed and those that had an exclusion criterion were removed. In the end, a total of 17 manuscripts were included in this review.

#### **List of Databases and Information providers linked to Delphis**

MEDLINE Complete

MEDLINE

Complementary Index

Academic Search Complete

Business Insights Global

ScienceDirect

Gale In Context: Global Issues

Journals@OVID

PASCAL Archive

Engineering Source

Gale In Context: Middle School

vLex

Regional Business News

Applied Science & Technology Source

Gale OneFile: CPI.Q

Business Source Complete

Computers & Applied Sciences Complete

JSTOR Journals

Education Source

SocINDEX with Full Text

FRANCIS Archive

Legal Source

Humanities Source

GreenFILE

Dentistry & Oral Sciences Source

Fuente Académica Premier

Library & Information Science Source

Library, Information Science & Technology Abstracts

eBook Index

Aerospace Research Central

eBook Collection (EBSCOhost)

Art & Architecture Source
